# Supplementary material for: Erratum to: Estimation of country-specific and global prevalence of male circumcision
Source: Popul Health Metr. 2016 Apr 4;14:11. doi: 10.1186/s12963-016-0080-6 (PMC4820865; doi:10.1186/s12963-016-0080-6)
Supplement: Additional file 1: — This spreadsheet provides data from published surveys on MC prevalence in all countries for which such studies have been conducted. (XLSX 49 kb) [file 12963_2016_80_MOESM1_ESM.xlsx]

## Sheet: National circumcision rates pub
Country (location)	Year(s) of Study	% Circ’d	Total n	Age (y)		Wealth Quintile		Education			Residences			Religion															Reference #	Notes
					Age at circumcision	Lowest	Highest	No education	Primary	Secondary +	Urban	Rural	Other	Catholic	Other Christian	Orthodox	Protestant	Anglican	Adventist	Traditional	Pentecostal	Buddhist	Muslim	Hindu	Lutheran	Jewish	None	Other
Albania	2008-2009	47.7	3013	15-49		46.1	55.6	36.7	48.2	46.3	48.9	46.6		…	…	…	…	…	…	…	…	…	…	…	…	…	…	…	33
Angola	2012	50	24	15-49		…	…	29.6	23.1	21	…	…	Refugee camp in Botswana	52.6	…	…	19.6	…	…	…	…	…	…	…	…	…	…	14.3	34	Religion & education is all men in the sample: Zimbabwe, Namibia, Angola, & Other
Angola		65	–	15-49		…	…	…	…	…	…	…		…	…	…	…	…	…	…	…	…	…	…	…	…	…	…	35
Australia	2005	58	4290	16-64		49.4	62.5	…	54.4	58.5	54.7	68.1		…	58.8	…	…	…	…	…	…	27.1	74.5	…	…	…	57.8	52.2	36
Australia	2014-2015	11	145,000 (births)	0-6 months		…	…	…	…	…	…	…		…	…	…	…	…	…	…	…	…	…	…	…	…	…	…	37
Australia	2000-2008	10.9	691738 singleton births (both sexes)	Birth Admission		…	…	…	…	…	…	…	New South Wales	…	…	…	…	…	…	…	…	…	…	…	…	…	…	…	38
Bangladesh	1996	87.5	540	15-30+		…	…	46.1	41.9	12	…	…	Slums in Dhaka	…	4	…	…	…	…	…	…	…	96	0	…	…	…	…	39
Bangladesh		99	–	–		…	…	…	…	…	…	…		…	…	…	…	…	…	…	…	…	…	…	…	…	…	…	40
Belgium (nationwide)		22.6	1369	18-79 (mean 37)	At birth or during childhood 56.5%, adolescence 9.7%, adulthood 33.9%	…	…	0.6	0.3	99.0	…	…		…	…	…	…	…	…	…	…	…	…	…	…	…	…	…	41
Benin (nationwide)	2011-2013	92.9	5180	15-64		…	…	…	…	…	93.7	93.1		95.1	93.6	…	97.8	…	…	48.2	…	…	95.2	…	…	…	…	89.1	42
Benin		99.1	748	15-49		…	…	…	…	…	…	…	Cotonou	…	…	…	…	…	…	…	…	…	…	…	…	…	…	…	43
Botswana (9 locations)	2001	24.7	316	18-74 (median 29)	0–30 (mean 13)	…	…	…	…	…	…	…		…	67	…	…	…	…	…	…	…		…	…	…	31*	31*	44	*Listed as no religion/other
Botswana	2008	11.8	447715	10-64y		…	…		…	…	…	…		…	…	…	…	…	…	…	…	…	…	…	…	…	…	…	45
Botswana	2008	12.9	1235	15-64	Newborn 46.5%, later 47.8%, don't know 5.7%	…	…	5.2	12.3	82.1	…	…		…	56.3	…	…	…	…	…	…	…		2*	…	…	37.7	…	46
Botswana	2008	11	878	15-29		…	…	…	13	87	…	…		…	…	…	…	…	…	…	…	…	…	…	…	…	…	…	47	Education data includes women
Brazil (nationwide)	1984-2010	1.3	51,447,538	26-78		…	…	…	…	…	…	…		…	…	…	…	…	…	…	…	…	…	…	…	…	…	…	48
Brazil	2005-2006	12.8	799	men > 18		…	…		…	…	…	…	Rio de Janeiro	…	…	…	…	…	…	…	…	…	…	…	…	…	…	…	49
Brazil	1990-1991	6.1	148	‘men’		…	…	2.2	33.2	64.6	…	…	Sao Paulo	…	…	…	…	…	…	…	…	…	…	…	…	…	…	…	50
Brazil	1990-1991	7.4	~66	‘men’		…	…	…	…	…	…	…	Sao Paulo	…	…	…	…	…	…	…	…	…	…	…	…	…	…	…	51
Brazil	2005-2009	14.2	1469	18-70		…	…	…	…	…	…	…	Sao Paulo	…	…	…	…	…	…	…	…	…	…	…	…	…	…	…	52
Burkina Faso (nationwide)	2010	88.3	7307	15-59		…	…	…	…	…	93.7	86.5		84.8	…	…	82.0	…	…	57.7	…	…	95.5	…	…	…	…	…	53
Burma		3.5	–	–		…	…	…	…	…	…	…		…	…	…	…	…	…	…	…	…	…	…	…	…	…	…	40
Burundi	2010	33.2	3760	15-49		…	…	…	…	…	64.8	27.4		27.2	…	…	39.1	…	76.2	…	…	…	85.7	…	…	…	22.6	…	54
Burundi	2005; 2010	91	11	15-49		…	…	58.1	95.1	98.3	…	…	Refugee camp in Tanzania	94.8	…	…	97.2	…	…	…	…	…	100	…	…	…	…	100	55	Religion & education is all men: Burundian, Congolese, Kenyan, Rwandan, Tanzanian, Ugandan
Burundi	2005	60.9	151	15-49		…	…	…	…	…	…	…	Refugee camp In Mozambique	…	…	…	…	…	…	…	…	…	…	…	…	…	…	…	56
Cambodia		3.5	–	–		…	…	…	…	…	…	…		…	…	…	…	…	…	…	…	…	…	…	…	…	…	…	40
Cameroon (nationwide)	2011	94	7191	15-59		…	…	…	…	…	97.8	89.0		95.2	96.7	…	93.8	…	…	…	…	…	98.3	…	…	…	…	93.8	57
Cameroon		99.1	784	15-49 years		…	…	…	…	…	…	…	Yaoundé	…	…	…	…	…	…	…	…	…		…	…	…	…	…	43
Canada	1993-1994	43.6	69100	0-1		…	…	…	…	…	…	…	Ontario	…	…	…	…	…	…	…	…	…	…	…	…	…	…	…	58	No education data given but study reports higher proportion of individuals with low education in those uncricumcised compared to circumcised (47·3 vs 52·6%, p<0·001).
Canada (nationwide)	2006-2007	31.9	76508	0-1		…	…	…	…	…	…	…		…	…	…	…	…	…	…	…	…	…	…	…	…	…	…	59	Main reason for male circumcision: religion (17.3%), health or hygiene (44.4%), to be like the father/siblings or peers (35.6%), other (2.7%)
Central African Republic		67	–	15-49		…	…	…	…	…	…	…	Central Region	…	…	…	…	…	…	…	…	…	…	…	…	…	…	…	35
Central African Republic	2006	67	–	–		…	…	…	…	…	…	…		…	…	…	…	…	…	…	…	…	…	…	…	…	…	…	60
Central African Republic		55	–	–		…	…	…	…	…	…	…		…	…	…	…	…	…	…	…	…	…	…	…	…	…	…	40
Chad		64	–	15-49		…	…	…	…	…	…	…	Central Region	…	…	…	…	…	…	…	…	…	…	…	…	…	…	…	35
Chad		82.5	–	–		…	…	…	…	…	…	…		…	…	…	…	…	…	…	…	…	…	…	…	…	…	…	40
China (4 areas)	1999-2007	2.7	15109	3-23years		…	…	…	…	…	…	…		…	…	…	…	…	…	…	…	…	…	…	…	…	…	…	61
China (MSM)	2007	11.6	328	18+ (mean 27)		*	*	…	7.4	21.5	…	…	Beijing	…	…	…	…	…	…	…	…	…		…	…	…	…	…	62	*Median monthly income 3000 Chinese yuan (interquartile range 1600–4000); 71.1% had college or higher education
China		19.9	662	16-68 (mean 32.2)		…	…	…	…	…	…	…	Xinjiang Uyghur and Yunnan Province-areas	…	…	…	…	…	…	…	…	…	…	…	…	…	…	…	63
China	2008	17	10421	0-18		…	…	…	…	…	…	…	Chongqing	…	…	…	…	…	…	…	…	…	…	…	…	…	…	…	64
China	2008	5.7	157	‘men’		*	*	…	34.5	44.6	…	…	Jiangsu	…	…	…	…	…	…	…	…	…	…	…	…	…	…	…	65	Income: ≤1,000 yuan 16.9%, 1001–2000 39.9%, 2001–3000 20.9%, >3000 22.3%
China	2013	2.8	2241	3-6 years		…	…	…	…	…	…	…	Hangzhou	…	…	…	…	…	…	…	…	…	…	…	…	…	…	…	66
China (MSM)	2009	11.6	570	18-69 (mean 26.5)		…	…	…	…	60	…	…	Chengdu	…	…	…	…	…	…	…	…	…	…	…	…	…	…	…	67
China	2010	46.2	3614	6-15	8.3±1.9 years	…	…	…	…	…	…	…	Urimqi	…	…	…	…	…	…	…	…	…	…	…	…	…	…	…	68
China (MSM)	2010-2011	8.2	1155	18-68 (mean 30)		…	…	…	…	…	…	…	Beijing	…	…	…	…	…	…	…	…	…	…	…	…	…	…	…	69
Colombia	1991-1991	1.5	471	‘men’		…	…	…	…	…	…	…		…	…	…	…	…	…	…	…	…	…	…	…	…	…	…	50
Colombia	1985-1988	6.9	~29	‘men’		…	…	…	…	…	…	…		…	…	…	…	…	…	…	…	…	…	…	…	…	…	…	51
Comoros	2012	99.4	2167	15-59		…	…	…	…	…	99.3	99.3		…	…	…	…	…	…	…	…	…	…	…	…	…	…	…	70
Congo, The (Brazzaville)		70		15-49																									35
Congo, Demo Republic	2007	97.2	4757	15-59		…	…	97.9	96.1	97.9	98.0	96.8		…	…	…	…	…	…	…	…	…	…	…	…	…	…	…	71
Congo, Democ Repub	2005	95.1	407	15-49		…	…	…	…	…	…	…	Refugee camp in Mozambique	…	…	…	…	…	…	…	…	…	…	…	…	…	…	…	56
Congo, Democratic Republic	2010	97.5	470	15-49		…	…	58.1	95.1	98.3	…	…	Refugee camp in Tanzania	94.8	…	…	97.2	…	…	…	…	…	100	…	…	…	…	100	55	Religion & education is all men: Burundian, Congolese, Kenyan, Rwandan, Tanzanian, Ugandan
Cote d’Ivoire (nationwide)	2011-2012	96.7	5135	15-59		…	…	…	…	…	98.2	95.7		…	…	…	….	…	…	…	…	…	…	…	…	…	…	…	72
Cote d’Ivoire (HIV-)	1989-1992	92.47	239	men'		…	…	57	20	23	…	…	Abidjan	…	…	…	….	…	…	…	…	…	…	…	…	…	…	…	73
Cote d’Ivoire (HIV+)	1989-1992	84.69	490	men'		…	…	54	24	21	…	…	Abidjan	…	…	…	….	…	…	…	…	…	…	…	…	…	…	…	73
Denmark (nationwide)	2005	5.3	2345	16-60+		…	…	…	…	…	…	…		0.43	…	…	….	…	…	…	…	…	0.8	…	4.6	0.666667	7.8	…	29	82.7% were Lutheran of whom 4.6% were circumcised; 10.9% with no religion of whom 7.8% were circumcised; 4 of 5 Muslim were circumcised as were 2 of 3 Jewish
Denmark	1993	12	216	18-40+		…	…	…	…	…	…	…	Copenhagen	…	…	…	….	…	…	…	…	…	…	…	…	…	…	…	74
Djibouti		94	–	15-49		…	…	…	…	…	…	…	Eastern Region	…	…	…	….	…	…	…	…	…	…	…	…	…	…	…	35
Djibouti		99	–	–		…	…	…	…	…	…	…		…	…	…	….	…	…	…	…	…	…	…	…	…	…	…	40
Dominican Republic (nationwide)	2007	13.7	27,975	15-59		10.8	15.6	10.5	12.4	13.1	14.2	11.3		…	…	…	….	…	…	…	…	…	…	…	…	…	…	…	75
Dominican Republic	2008	4.6	368	18-50		…	…	…	…	…	…	…	La Altagracia	…	…	…	….	…	…	…	…	…	…	…	…	…	…	…	76
Eritrea		95.5	–	15-49		…	…	…	…	…	…	…	Eastern Region	…	…	…	….	…	…	…	…	…	…	…	…	…	…	…	35
Eritrea		99	–	–		…	…	…	…	…	…	…		…	…	…	….	…	…	…	…	…	…	…	…	…	…	…	40
Ethiopia	2010-2011	92.2	14110	15-59		…	…	…	…	…	97.9	90.1		83.3	…	96.3	78.9	…	…	76.6	…	…	95.5	…	…	…	…	…	77
Ethiopia	2004	100	19	15-49		…	…	…	…	…	…	…	Refugee camp in Kenya	…	…	…	…	…	…	…	…	…	…	…	…	…	…	…	79
Finland	2010	2-4	–	….		…	…	…	…	…	…	…		…	…	…	…	…	…	…	…	…	…	…	…	…	…	…	78
France	2008	14	–	–		…	…	…	…	…	…	…		…	…	…	…	…	…	…	…	…	…	…	…	…	…	…	80
Gabon	2012	99.2	5654	15-59		…	…	…	…	…	99.1	99.1		99.1	99.0	…	99.2	…	…	…	…	…	99.1	…	…	…	…	93.5	81
Gambia, The		90	–	15-49		…	…	…	…	…	…	…	Western Region	…	…	…	…	…	…	…	…	…	…	…	…	…	…	…	35
Gambia, The		99	–	–		…	…	…	…	…	…	…		…	…	…	…	…	…	…	…	…	…	…	…	…	…	…	40
Germany (nationwide)		10.9	8985	0-17		…	…	…	…	…	…	…		…	…	…	…	…	…	…	…	…	…	…	…	…	…	…	82
Germany		6.7	2490	30-61		…	…	…	…	…	…	…	Cottbus, Brandenburg	…	…	…	…	…	…	…	…	…	…	…	…	…	…	…	83
Ghana	2008	91.6	4568	15-59		84.4	88.7	84.7	92.0	91.1	91.2	91.6		…	…	…	…	…	…	…	…	…	…	…	…	…	…	…	84
Guinea Equatorial	2011	87.0	1457	15-49		…	…	…	…	…	…	…		…	…	…	…	…	…	…	…	…	…	…	…	…	…	…	85
Guinea Equatorial		86	–	15-49		…	…	…	…	…	…	…	Western Region	…	…	…	…	…	…	…	…	…	…	…	…	…	…	…	35
Guinea Equatorial		96	–	–		…	…	…	…	…	…	…		…	…	…	…	…	…	…	…	…	…	…	…	…	…	…	40
Guinea-Bissau		91	–	15-49		…	…	…	…	…	…	…	Western Region	…	…	…	…	…	…	…	…	…	…	…	…	…	…	…	35
Guinea-Bissau	2006	91	–	–		…	…	…	…	…	…	…		…	…	…	…	…	…	…	…	…	…	…	…	…	…	…	60
Guinea-Bissau		98	–	–		…	…	…	…	…	…	…		…	…	…	…	…	…	…	…	…	…	…	…	…	…	…	40
Guyana	2009	12	3522	15-49		8.2	14	6.6	10.8	78.1	13.8	11.4		…	…	…	…	…	…	…	…	…	…	…	…	…	…	…	86
Haiti	2008	6.2	130	18-50		…	…	…	…	…	…	…	Immigrants of the DR	…	…	…	…	…	…	…	…	…	…	…	…	…	…	…	76
Hong Kong	2009-2010	28	353	18-60		…	…	…	15.2	45.5	…	…		…	…	…	…	…	…	…	…	…	…	…	…	…	…	…	87
India (3 STIclinics)	1993-2000	9.1	2298	‘men’		…	…	9.5	45.8	44.7	…	…	Pune	…	…	…	…	…	…	…	…	…	97.6	34.2	…	…	…	3.7	88
India (Truck Drivers)	2007-2008	16.1	90	19-52		…	…	…	…	…	…	…	Andhra Pradesh	…	…	…	…	…	…	…	…	…	…	…	…	…	…	…	89
India	2009	6.6	500	18+ (mean 28)		…	…	…	…	…	…	…	Pune	…	…	…	…	…	…	…	…	…	…	…	…	…	…	…	90
India	2010-2011	22.2	1602	16-65		…	…	…	…	…	…	…	Truck Driver/Helpers through Hyderabad city	…	…	…	…	…	…	…	…	…	…	…	…	…	…	…	91
Indonesia		92.5	–	–		…	…	…	…	…	…	…		…	…	…	…	…	…	…	…	…	…	…	…	…	…	…	40
Jamaica	2008	9	100	‘men’		…	…	…	…	…	…	…	Kingston main STI clinic	…	…	…	…	…	…	…	…	…	…	…	…	…	…	…	92
Jamaica	2011	14	549	19-54		*	*	…	20.8	79.2	…	…	Western Jamaica	…	…	…	…	…	…	…	…	…	…	…	…	…	17.1	82.9	93	*Monthly income: 72.7% if ≤$JA30,000, 27.3% if >$JA30,000; data for income, education and religion only for sample of 77 circumcised men
Japan	2009-2010	9	188	18-89 (median 40.5)		…	…	…	…	…	…	…	Kanagawa Prefecture	…	…	…	…	…	…	…	…	…	…	…	…	…	…	…	94
Kenya	2008-2009	85.9	3465	15-54		…	…	86.3	85.4	89.8	91.2	83.8		…	…	…	…	…	…	…	…	…	…	…	…	…	…	…	95
Kenya (nationwide)	2012-2013	91.2	7452	15-64		…	…	…	…	…	…	…		…	…	…	…	…	…	…	…	…	…	…	…	…	…	…	96
Kenya		27.5	567	15-49		…	…	20.6	33.3	46.1	…	…	Kisumu	…	85.6	…	…	…	…	…	…	…		…	…	…	…	14.1	43
Kenya	1993-1997	87.3	746	16-62		…	…	…	…	…	…	…		…	…	…	…	…	…	…	…	…	…	…	…	…	…	…	97
Korea, South	2001	78	1742	20	7.8% at age <10 years, 55.2% at age 10–15, 37% >15 years	…	…	…	…	…	…	…	Choong-chung South Provence	…	…	…	…	…	…	…	…	…	…	…	…	…	…	…	98
Korea, South	2002	88.3	368	18-28		…	…	…	…	…	…	…	Busan	…	…	…	…	…	…	…	…	…	…	…	…	…	…	…	99
Korea, South (nationwide; Internet)	2009-2011	81.6	971	20-29		…	…	…	…	…	…	…		…	…	…	…	…	…	…	…	…	…	…	…	…	…	…	100
Korea, South	2000	~60	5434	0-92		…	…	…	…	…	…	…	Seoul	…	…	…	…	…	…	…	…	…	…	…	…	…	…	…	101
Kyrgyz Republic	2012	91.9	2413	15-49		…	…	…	…	…	82.7	96.4		…	…	…	…	…	…	…	…	…	…	…	…	…	…	…	102
Lesotho	2009-2010	61.2	2546	15-59 (mean 28)		…	…	…	…	…	…	…		…	…	…	…	…	…	…	…	…	…	…	…	…	…	…	103
Lesotho	2009	52	3317	15-49		74.2	28.8	…	…	…	33.8	58.6		49.4	45	…	…	49.3	…	…	59.4	…	…	…	…	…	61.2	58.2	104
Lesotho	2014	72.3	2660	15-49		76.8	70.1	87.6	72.9	68.3	68.4	74.3		…	…	…	…	…	…	…	…	…	…	…	…	…	…	…	105
Liberia	2007	97.7	6009	15-49		96.9	98.5	97.3	97.3	98.2	98.6	97.1		…	…	…	…	…	…	…	…	…	…	…	…	…	…	…	106
Liberia	2013	99.2	4118	15-49		…	…	…	…	…	99.3	99		…	99.3	…	…	…	…	96.8	…	…	98.8	…	…	…	99.2	…	107
Madagascar	2008-2009	94.7	8586	15-59		…	…	93.5	93.8	96.4	96.1	94.4		…	…	…	…	…	…	…	…	…	…	…	…	…	…	…	108
Malawi	2004	20.7	3114	12-50+		…	…	…	…	…	20.5	21.3		…	…	…	…	…	…	…	…	…	…	…	…	…	…	…	109
Malawi (young men never married)	2010	18.2	2459	15-24	Median age 15 years	…	…	…	…	…	…	…		…	…	…	…	…	…	…	…	…	…	…	…	…	…	…	110
Malawi	2010	21.6	7175	15-54		…	…	…	…	…	23.5	20.9		…	…	…	…	…	…	…	…	…	…	…	…	…	…	…	111
Malawi:	2004; 2006	–	–	–		…	…	…	…	…	…	…		…	…	…	…	…	…	…	…	…	…	…	…	…	…	…	112
vendors (4 districts)	2004; 2007	34	401	15-24		…	…	…	…	…	…	…		…	…	…	…	…	…	…	…	…	…	…	…	…	…	…	112
fishermen (3 districts)	2004; 2008	47.7	352	18-49		…	…	…	…	…	…	…		…	…	…	…	…	…	…	…	…	…	…	…	…	…	…	112
truck drivers (7 districts)	2004; 2009	25.9	231	18-49		…	…	…	…	…	…	…		…	…	…	…	…	…	…	…	…	…	…	…	…	…	…	112
estate workers (4 distr)	2004; 2010	58.2	368	18-49		…	…	…	…	…	…	…		…	…	…	…	…	…	…	…	…	…	…	…	…	…	…	112
police officers (9 distr)	2004; 2011	15.8	323	20-49		…	…	…	…	…	…	…		…	…	…	…	…	…	…	…	…	…	…	…	…	…	…	112
primary teachers (9 dist)	2004; 2012	15.9	321	20-49		…	…	…	…	…	…	…		…	…	…	…	…	…	…	…	…	…	…	…	…	…	…	112
secondary teachers (all)	2004; 2013	14.9	1234	18-49		…	…	…	…	…	…	…		…	…	…	…	…	…	…	…	…	…	…	…	…	…	…	112
Mali (military)	2000-2005	86	1102	–		…	…	…	…	…	…	…	Genie military garrison	…	…	…	…	…	…	…	…	…	…	…	…	…	…	…	113
Mauritania		78	–	15-49		…	…	…	…	…	…	…	Western Region	…	…	…	…	…	…	…	…	…	…	…	…	…			35
Mexico	2005-2009	15.4	1320	18-70		…	…	…	…	…	…	…	Cuernavaca	…	…	…	…	…	…	…	…	…	…	…	…	…	…	…	52
Mozambique	2011	48.4	4035	15-64		…	…	…	…	…	51.6	44.8		53.7	…	…	49.3	35.4	…	…	30.9	…	84.1	…	…	…	…	30.4	114
Namibia	2006-2007	20.9	3915	15-49		…	…	26.1	15.5	24.4	25.9	16.1		…	…	…	…	…	…	…	…	…	…	…	…	…	…	…	115
Namibia	2008	27.6	1035	15-29	93.6% had MC as an infant or child	…	…	…	…	…	…	…		…	…	…	…	…	…	…	…	…	…	…	…	…	…	…	47
Namibia	2008	55.6	45	15-49		…	…	…	…	…	…	…	Surrounding nationals	…	…	…	…	…	…	…	…	…	…	…	…	…	…	…	116	Circumcision median age for refugees = 7 years; for surrounding community = 5 years
Namibia	2008	85.4	103	15-49		…	…	…	…	…	…	…	Osire refugee camp	…	…	…	…	…	…	…	…	…	…	…	…	…	…	…	116
Namibia	2012	9.2	76	15-49		…	…	29.6	23.1	21	…	…	Refugee camp in Botswana	52.6	…	…	19.6	…	…	…	…	…	…	…	…	…	…	14.3	34	Religion & education is all men in the sample: Zimbabwe, Namibia, Angola, & Other
Namibia	2013	25.5	4021	15-49		…	…	…	…	…	30.0	19.7		23.1	…	…	33.9*	33.9*	20.6	…	…	…	…	…	…	…	43.5	39.0	117	*Reported as Protestant/Anglican
New Zealand	mid-1977	30.2	510	18-25		…	…	…	…	…	…	…	Christchurch	…	…	…	…	…	…	…	…	…	…	…	…	…	…	…	118
New Zealand	1972-1973	40	523	32		29.4	17.8	…	33	45.6	…	…	Dunedin	…	…	…	…	…	…	…	…	…	…	…	…	…	…	…	119	Wealth = "socioeconomic status at 32"; Education: primary is "high school or less"
Niger		92	–	15-49		…	…	…	…	…	…	…	Western Region	…	…	…	…	…	…	…	…	…	…	…	…	…	…	…	35
Niger		99	–	–		…	…	…	…	…	…	…		…	…	…	…	…	…	…	…	…	…	…	…	…	…	…	40
Nigeria	2013	98.9	17,359	15-49		99.1	98.7	98.5	99.2	98.9	99	98.8		…	…	…	…	…	…	…	…	…	…	…	…	…	…	…	120
Nigeria	2008	97.9	15486	15-59		98.1	97.7	97.7	97.9	97.9	97.4	98.2		…	…	…	…	…	…	…	…	…	…	…	…	…	…	…	121
Nigeria		100	154	males		…	…	…	…	…	…	…	Southern 5 villages	…	…	…	…	…	…	…	…	…	…	…	…	…	…	…	122
Nigeria		99	757	sons		…	…	…	…	…	…	…	Southern 5 villages	…	…	…	…	…	…	…	…	…	…	…	…	…	…	…	122
Nigeria	1994-1995	99	1749	avg 35		…	…	…	…	…	…	…		…	…	…	…	…	…	…	…	…	…	…	…	…	…	…	123
Papua New Guinea:	2010-2011	–	–	–		…	…	…	…	…	…	…		…	…	…	…	…	…	…	…	…	…	…	…	…	…	…
A circumferential foreskin cut (complete removal)		10.1	861	18-65	Performed at ages 1–30 (mean 15±6.7)	…	…	…	…	…	…	…		…	…	…	…	…	…	…	…	…	…	…	…	…	…	…	124
Logitudinal foreskin cut (cut through the dorsal surface to expose the glans but foreskin not removed)		47	861	18-65	Performed at ages 2–38 (mean 17±4.8)	…	…	…	…	…	…	…		…	…	…	…	…	…	…	…	…	…	…	…	…	…	…	124
Papua New Guinea:	2010-2011	–	–	–		…	…	…	…	…	…	…		…	…	…	…	…	…	…	…	…	…	…	…	…	…	…
New Guinea Islands		23.1	861	18-65		…	…	…	…	…	…	…		…	…	…	…	…	…	…	…	…	…	…	…	…	…	…	125
Momase region		13.1	861	18-65		…	…	…	…	…	…	…		…	…	…	…	…	…	…	…	…	…	…	…	…	…	…	125
Highlands region		9.2	861	18-65		…	…	…	…	…	…	…		…	…	…	…	…	…	…	…	…	…	…	…	…	…	…	125
Southern region		7.5	861	18-65		…	…	…	…	…	…	…		…	…	…	…	…	…	…	…	…	…	…	…	…	…	…	125
Peru	2006	3.7	2048	21-30 (mean 24)		…	…	…	…	…	…	…	Andes	…	…	…	…	…	…	…	…	…	…	…	…	…	…	…	126
Philippines	1991-1993	91	266	‘men’		…	…	…	…	…	…	…	Manila	…	…	…	…	…	…	…	…	…	…	…	…	…	…	…	50
Philippines	1991-1993	92.5	~107	‘men’		…	…	…	…	…	…	…	Manila	…	…	…	…	…	…	…	…	…	…	…	…	…	…	…	51
Rwanda	2010	13.3	6329	15-59		6.3	29.0	7.4	9.4	30.4	31.6	9.9		9.7	…	…	14.9	…	13.7	14.4*	…	…	72.6	…	…	…	14.4*	14.4*	127	*Traditional/other/no religion grouped together
Rwanda	2005	20	81	15-49		…	…	…	…	…	…	…	Refugee camp in Mozambique	…	…	…	…	…	…	…	…	…	…	…	…	…	…	…	56
Scotland (MSM)	2008	16.6	1405	16-46+		…	…	…	…	…	…	…	Glasgow & Edinburgh	…	…	…	…	…	…	…	…	…	…	…	…	…	…	…	128
Senegal		89	–	15-49		…	…	…	…	…	…	…	Western Region	…	…	…	…	…	…	…	…	…	…	…	…	…	…	…	35
Senegal		98	–	–		…	…	…	…	…	…	…		…	…	…	…	…	…	…	…	…	…	…	…	…	…	…	40
Sierra Leone	2008	96.1	3280	15-49		…	…	95.2	96.9	96.6	97.0	95.3		…	…	…	…	…	…	…	…	…	…	…	…	…	…	…	129
Slovenia	1999-2001	4.5	831	18-49		…	…	…	2.8	4.4	…	…	Ljubljana	1.7	…	…	…	…	…	…	…	…	92.4	…	…	…	7.1	0*	130	*Evangelical, Serbian Orthodox, other
Slovenia	2003-2009	12.6	247	8-83 (mean 51)		…	…	…	…	…	…	…	Ljubljana	…	…	…	…	…	…	…	…	…	…	…	…	…	…	…	131
Somalia		93	–	15-49		…	…	…	…	…	…	…	Eastern Region	…	…	…	…	…	…	…	…	…	…	…	…	…	…	…	35
Somalia	2010	94	458	15-49		…	…	…	…	…	…	…	Refugee camp in Kenya	…	…	…	…	…	…	…	…	…	…	…	…	…	…	…	132
Somalia	2004	97.2	252	15-49		…	…	…	…	…	…	…	Refugee camp in Kenya	…	…	…	…	…	…	…	…	…	…	…	…	…	…	…	79
South Africa	2002	13	100	20-76 (median age 26)		…	…	…	…	…	9	91	96% Zulu	…	…	…	…	…	…	…	…	…	…	…	…	…	…	…	133
South Africa	2003	44.7	3118	15-59		…	…	43.8	*	*	42.8	48.7		…	…	…	…	…	…	…	…	…	…	…	…	…	…	…	134	*Education by "Grades": 1-5 (52.8%), 6-7 (45.9%), 8-11 (43.0%), 12 (43.8%); "higher" (47.3%)
South Africa	2001	39.1	1619	18-24		…	…	…			…	…		…	…	…	…	…	…	…	…	…	…	…	…	…	…	…	135
South Sudan	2006	44	351	15-49		…	…	…	…	…	…	…	Juba Municipality	…	…	…	…	…	…	…	…	…	…	…	…	…	…	…	136
South Sudan	2008	9.4	389	15-49		…	…	…	…	…	…	…	Kajo Keji County	…	…	…	…	…	…	…	…	…	…	…	…	…	…	…	137
South Sudan		17.5	–	–		…	…	…	…	…	…	…		…	…	…	…	…	…	…	…	…	…	…	…	…	…	…	40
Spain	1985-1987	11.5	627	‘men’		…	…	…	…	…	…	…	Barcelona	…	…	…	…	…	…	…	…	…	…	…	…	…	…	…	50
Spain	1985-1987	1.8	~53	‘men’		…	…	…	…	…	…	…	Barcelona	…	…	…	…	…	…	…	…	…	…	…	…	…	…	…	51
Sudan		47.5	–	15-49		…	…	…	…	…	…	…	Eastern Region	…	…	…	…	…	…	…	…	…	…	…	…	…	…	…	35
Sudan	2004	31.4	630	15-49		…	…	…	…	…	…	…	Refugee camp in Kenya	…	…	…	…	…	…	…	…	…	…	…	…	…	…	…	79
Swaziland	2006-2007	8.2	4156	15-49		5.5	11.9	10.0	6.7	8.6	13.3	6.2		…	…	…	…	…	…	…	…	…	…	…	…	…	…	…	138
Swaziland	2008	7.8	982	15-29	67.7% of these circumcised as an infant or child	…	…	…	…	…	…	…		…	…	…	…	…	…	…	…	…	…	…	…	…	…	…	47
Taiwan	2001	8.3	1204	7-13years		…	…	…	…	…	…	…	Taipei City	…	…	…	…	…	…	…	…	…	…	…	…	…	…	…	139
Tanzania	2007-2008	66.8	6975	15-49		52.4	90.7	53.8	69.4	84.8	88.4	59.9		…	…	…	…	…	…	…	…	…	…	…	…	…	…	…	140
Tanzania (nationwide)	2010	72.3	2527	15-49		64.8	92.4	52.4	72.4	87.5	89.9	65.6		…	…	…	…	…	…	…	…	…	…	…	…	…	…	…	141
Tanzania (nationwide)	2011-2012	72	8352	15-49		…	…	…	…	…	…	…		…	…	…	…	…	…	…	…	…	…	…	…	…	…	…	142
Tanzania	1990-2012	57.9	164	18+		…	…	…	…	…	…	…	Geita Gold Mine	…	…	…	…	…	…	…	…	…	…	…	…	…	…	…	143
Thailand	1990-1993	10	401	‘men’		…	…	…	…	…	…	…	Hat-Yai	…	…	…	…	…	…	…	…	…	…	…	…	…	…	…	50
Thailand	1990-1993	13.3	~45	‘men’		…	…	…	…	…	…	…	Hat-Yai	…	…	…	…	…	…	…	…	…	…	…	…	…	…	…	51
Thailand	2008	12.3	408	18-50		…	…	…	…	…	…	…	Bangkok; Chonbury	…	…	…	…	…	…	…	…	…	…	…	…	…	…	…	144
Togo		93	–	15-49		…	…	…	…	…	…	…	Western Region	…	…	…	…	…	…	…	…	…	…	…	…	…	…	…	35
Togo		97.5	–	–		…	…	…	…	…	…	…		…	…	…	…	…	…	…	…	…	…	…	…	…	…	…	40
Timor-Leste	2009-2010	6.4	4076	15-49		13	4.8	8.0	9.0	4.5	6.6	6.3		…	…	…	…	…	…	…	…	…	…	…	…	…	…	…	145
Uganda	2010	28	7,969	15-59		…	…	…	…	31.3	…	81		…	…	…	…	…	…	…	…	…	99.6*	…	…	…	…	…	146	* Muslim 46.1%; 99.6% of Muslim men were circumcised
Uganda (nationwide)	2011	26.8	2295	15-54		…	…	…	…	…	40.2	23.4		14.9	…	…	19.9	…	…	…	21.9	…	93.5	…	…	…	…	…	147
Uganda (nationwide)	2011	26.7	9588	15-49		17.1	35.2	…	…	…	37.0	23.8		13.2	19.7	…	18.2	18.2	29.2	…	16.7	…	97.9	…	…	…	…	23.8	148
Uganda	2009	85.4	445	med age 30		…	…	…	…	…	…	…	Dadaab refugee camp	…	…	…	…	…	…	…	…	…	98	…	…	…	…	…	132
Uganda	2009	8.5	566	med age 29		…	…	…	…	…	…	…	Dadaab (surrounding nationals)	…	…	…	…	…	…	…	…	…	98	…	…	…	…	…	132
Uganda	1997	51.5	365	>17		…	…	…	…	…	…	…	Industrial Borough, Mbale	…	…	…	…	…	…	…	…	…	…	…	…	…	…	…	149
Ukraine	2007	2.3	3178	15-49		…	…	…	…	…	…	…		…	…	…	…	…	…	…	…	…	…	…	…	…	…	…	150
United Kingdom	2000	15.8	4,762	16-44		…	…	…	…	…	…	…	British; London	…	…	…	…	…	…	…	…	…	…	…	…	98.7	…	…	151
United Kingdom	1994-1997	47.9	305	4-97		…	…	…	…	…	…	…		…	…	…	…	…	…	…	…	…	…	…	…	…	…	…	152	Total n=357, but 305 ("men without genital skin disease") were examined for circumcision calculation
United Kingdom	1997-2004	2.1	75,868	0-15		…	…	…	…	…	…	…		…	…	…	…	…	…	…	…	…	…	…	…	…	…	…	153	2.1% circumcision prevalence is per 1,000 boys and for 2003, having declined from 2.6% in 1997
United Kingdom (MSM)	2008	28.8	689	med age 39		…	…	…	…	…	…	…	Gyms in London	…	…	…	…	…	…	…	…	…	…	…	…	…	…	…	154
United Kingdom	2008	16.6	1508	16-45+		…	…	…	…	…	…	…	Glasgow; Edinburgh	…	…	…	…	…	…	…	…	…	…	…	…	…	…	…	128
United Kingdom	2001-2002	1.9	–	0-13		…	…	…	…	…	…	…	Northern Island	…	…	…	…	…	…	…	…	…	…	…	…	…	…	…	155
United Kingdom	2010-2012	20.7	6293	16-74		…	…	…	…	…	…	…		…	19.4	…	…	…	…	…	…	…	85.2	2.6	…	…	16.2	32.7	156
United States (nationwide)	2005-2010	80.5	6294	14-59		…	…	…	…	…	…	…		…	…	…	…	…	…	…	…	…	…	…	…	…	…	…	26
United States	2005-2009	81.2	1315	18-70+		…	…	…	…	…	…	…	Southern Florida	…	…	…	…	…	…	…	…	…	…	…	…	…	…	…	52
United States	2009	56	–	newborn		51.5	60.4	…	…	…	41.2	66.9	West 24.6%, Midwest 75.2%, Northeast 67.0%, South 55.7%	…	…	…	…	…	…	…	…	…	…	…	…	…	…	…	158
United States	2000-2010	56.9	21.6 million	newborn		…	…	…	…	…	…	…	Northeast 66.8%, Midwest 76.6%, South 57.0%, West 33.1%	…	…	…	…	…	…	…	…	…	…	…	…	…	…	…	159	56.9% is national male circumcision prevalence for year 2010, having declined from 61.3% in 2000
United States	2010-2011	71.2	222546	0-18		…	…	…	…	…	…	…		…	…	…	…	…	…	…	…	…	…	…	…	…	…	…	27
Zambia	2013-2014	21.6	14773	15-59		…	…	…	…	…	29.1	15.7		17.6	…	…	22.5	…	…	…	…	…	70.8	…	…	…	…	25.2	160
Zambia	2007	12.8	6500	15-59		11.1	11.7	12.6	11.9	13.1	13.1	12.4		…	…	…	…	…	…	…	…	…	…	…	…	…	…	…	161
Zambia		9	511	15-49		…	…	…	…	…	…	…	Ndola	…	…	…	…	…	…	…	…	…	…	…	…	…	…	…	43
Zambia	2006	91.3	356	15-49		…	…	…	…	…	…	…	Mporokoso refugee camp	…	…	…	…	…	…	…	…	…	…	…	…	…	…	…	162
Zambia	2006	3.5	343	15-49		…	…	…	…	…	…	…	Mporokoso (surrounding community)	…	…	…	…	…	…	…	…	…	…	…	…	…	…	…	162
Zambia	2006	88.3	358	15-49		…	…	…	…	…	…	…	Kawambwa refugee camp	…	…	…	…	…	…	…	…	…	…	…	…	…	…	…	162
Zambia	2006	7.9	420	15-49		…	…	…	…	…	…	…	Kawamba (surrounding community)	…	…	…	…	…	…	…	…	…	…	…	…	…	…	…	162
Zimbabwe	2010-2011	9.2	7480	15-54		…	…	…	…	…	9.7	8.7		9.2	7.0	…	9.4	…	…	13.0	9.6	…	78.1	…	…	…	8.0	*	163	Religion: 78.1% Muslim is based on 25-49 unweighted cases; * indicates fewer than 25 unweighted cases
Zimbabwe	2013	15.7	51	15-49		…	…	29.6	23.1	21	…	…	Refugee camp in Botswana	52.6	…	…	19.6	…	…	…	…	…	…	…	…	…	…	14.3	34	Religion & education is all men in the sample: Zimbabwe, Namibia, Angola, & Other
