# Supplementary material for: Erratum to: Estimation of country-specific and global prevalence of male circumcision
Source: Popul Health Metr. 2016 Apr 4;14:11. doi: 10.1186/s12963-016-0080-6 (PMC4820865; doi:10.1186/s12963-016-0080-6)
Supplement: Additional file 2: — This spreadsheet shows data for number of males using CIA data and estimates of number of circumcised males in all 237 countries and territories in the world, as well as basis for the estimate and MC percentage for each. (XLSX 29 kb) [file 12963_2016_80_MOESM2_ESM.xlsx]

## Sheet: Sheet1
Country/Territory	Muslim %	Jewish %	MC %	CIA Total Males	Total MC	Basis
Afghanistan	99.8	–	99.8	16523302	1.64903e+07	Relig
Albania	82.1	–	47.7	1499340	715185	Survey
Algeria	97.9	–	97.9	20063266	1.96419e+07	Relig
American Samoa	<0.1	–	95	27172	25813.4	Culture
Andorra	1.1	–	1.1	44036	484.396	Relig
Angola	1	–	57.5	9909832	5.69815e+06	Survey
Anguilla	0.3	–	0.3	7867	23.601	Relig
Antigua & Barbuda	0.6	–	0.6	43785	262.71	Relig
Argentina	2.5	0.43	2.93	21385243	626588	Relig
Armenia	<0.1	–	0.1	1480927	1480.93	Relig
Aruba	0.4	0.06	0.46	53129	244.393	Relig
Australia	1.9	0.49	58	11432102	6.63062e+06	Survey
Austria	5.7	0.11	5.81	4244351	246597	Relig
Azerbaijan	98.4	0.1	98.5	4840992	4.76838e+06	Relig
Bahamas, The	0.1	0.1	0.2	158986	317.972	Relig
Bahrain	81.2	–	81.2	816450	662957	Relig
Bangladesh	90.4	–	93.25	82312748	7.67566e+07	Survey
Barbados	0.9	–	0.9	140808	1267.27	Relig
Belarus	0.2	0.12	0.32	4461513	14276.8	Relig
Belgium	6	0.27	22.6	5575763	1.26012e+06	Survey
Belize	0.1	–	0.1	176251	176.251	Relig
Benin	24.5	–	92.9	5250315	4.87754e+06	Survey
Bermuda	0.8	–	0.8	34012	272.096	Relig
Bhutan	1	–	1	386934	3869.34	Relig
Bolivia	<0.1	<0.01	0.11	5345891	5880.48	Relig
Bosnia & Herzegovina	41.6	0.01	41.61	1883950	783912	Relig
Botswana	0.4	<0.01	15.1	1107488	167231	Survey
Brazil	0.1	0.05	1.3	100574628	1.30747e+06	Survey
British Virgin Islands	1.2	–	1.2	16030	192.36	Relig
Brunei	51.9	–	51.9	212653	110367	Relig
Bulgaria	13.4	0.03	13.43	3501307	470226	Relig
Burkina Faso	58.9	–	88.3	9418276	8.31634e+06	Survey
Burma	3.8	–	3.5	28018595	980651	Survey
Burundi	2.2	–	61.7	5344147	3.29734e+06	Survey
Cabo Verde	0.1	–	0.1	264553	264.553	Relig
Cambodia	1.6	–	3.5	7611459	266401	Survey
Cameroon	18	–	94	11928662	1.12129e+07	Survey
Canada	2.8	1.09	31.9	17372646	5.54187e+06	Survey
Cayman Islands	0.2	–	0.2	27327	54.654	Relig
Central African Republic	8.9	–	63	2668540	1.68118e+06	Survey
Chad	55.7	–	73.5	5604795	4.11952e+06	Survey
Chile	<0.1	0.11	0.21	8620818	18103.7	Relig
China	1.8	<0.01	13.9667	703657530	9.82775e+07	Survey
Christmas Island	–	–	0.1	770	0.77	No info
Cocos (Keeling) Islands	–	–	95	300	285	Culture
Columbia	<0.1	<0.01	4.2	23132320	971557	Survey
Comoros	98.3	–	99.4	378409	376139	Survey
Congo, Dem Rep	1.4	<0.01	97.2	39488133	3.83825e+07	Survey
Congo, Republic	1.6	–	70	2389377	1.67256e+06	Survey
Cook Islands	<0.1	–	95	5085	4830.75	Culture
Costa Rica	<0.1	0.05	0.15	2419047	3628.57	Relig
Cote d’Ivoire	36.9	–	96.7	11762974	1.13748e+07	Survey
Croatia	1.3	0.04	1.34	2151453	28829.5	Relig
Cuba	0.1	<0.01	0.11	5487999	6036.8	Relig
Curacao	<0.01	0.06	0.07	70359	49.2513	Relig
Cyprus	22.7	–	22.7	606257	137620	Relig
Czech Republic	<0.1	0.04	0.14	5242368	7339.32	Relig
Denmark	4.1	0.12	5.3	2748253	145657	Survey
Djibouti	97	–	96.5	380581	367261	Survey
Dominica	0.2	–	0.2	37168	74.336	Relig
Dominican Republic	<0.1	<0.01	13.7	5316807	728403	Survey
Ecuador	<0.1	<0.01	0.11	7894328	8683.76	Relig
Egypt	94.7	<0.01	94.7	44681754	4.23136e+07	Relig
El Salvador	<0.1	<0.01	0.11	2959303	3255.23	Relig
Equatorial Guinea	4.1	–	87	368510	320604	Survey
Eritrea	36.5	–	97.25	3230876	3.14203e+06	Survey
Estonia	0.1	0.15	0.25	588725	1471.81	Relig
Ethiopia	33.8	<0.01	92.2	49482995	4.56233e+07	Survey
Falkland Islands (Islas Malvinas)	<0.1	–	0.1	1689	1.689	Relig
Faroe Islands	<0.1	–	0.1	26179	26.179	Relig
Fiji	6.3	–	55	461414	253778	Culture
Finland	0.8	0.02	0.82	2696759	22113.4	Relig
France	7.5	0.74	14	32597763	4.56369e+06	Survey
French Polynesia	<0.1	–	78	144799	112943	Culture
Gabon	9.7	–	99.2	848383	841596	Survey
Gambia, The	95.3	–	94.5	973917	920352	Survey
Gaza Strip	98	6.6	99.9	952852	951899	Relig
Georgia	10.5	0.06	10.56	2362879	249520	Relig
Germany	5	0.15	6.7	39811561	2.66737e+06	Survey
Ghana	16.1	–	91.6	12963360	1.18744e+07	Survey
Gibraltar	4	2	6	14702	882.12	Relig
Greece	4.7	0.04	4.74	5277866	250171	Relig
Greenland	<0.1	–	0.1	30241	30.241	Relig
Grenada	0.3	–	0.3	56165	168.495	Relig
Guam	<0.1	–	95	82088	77983.6	Culture
Guatemala	<0.1	<0.01	0.11	7345903	8080.49	Relig
Guernsey	0.1	–	0.1	32874	32.874	Relig
Guinea	84.2	–	84.2	5890081	4.95945e+06	Relig
Guinea-Bissau	42.8	–	93.3333	840954	784890	Survey
Guyana	7.2	–	12	371251	44550.1	Survey
Haiti	<0.1	–	6.2	5029607	311836	Survey
Holy See (Vatican City); assume all male)	<0.1	–	0.1	842	0.842	No info
Honduras	0.1	–	0.1	4395094	4395.09	Relig
Hong Kong	1.3	–	28	3322333	930253	Survey
Hungary	0.3	0.48	0.78	4715582	36781.5	Relig
Iceland	0.1	–	0.1	166785	166.785	Relig
India	14.6	<0.01	13.5	649918861	8.7739e+07	Survey
Indonesia	88.1	–	92.5	127996837	1.18397e+08	Survey
Iran	99.7	0.01	99.71	41516748	4.13963e+07	Relig
Iraq	98.9	–	98.9	18711531	1.85057e+07	Relig
Ireland	0.9	0.03	0.93	2446153	22749.2	Relig
Isle of Man	0.2	–	0.2	43773	87.546	Relig
Israel	17.7	74	91.7	4044680	3.70897e+06	Relig
Italy	2.6	0.05	2.65	29805835	789855	Relig
Jamaica	<0.1	0.01	14	1460205	204429	Survey
Japan	0.1	<0.01	9	61497154	5.53474e+06	Survey
Jersey	0.1	–	0.1	47906	47.906	Relig
Jordan	98.8	–	98.8	4098968	4.04978e+06	Relig
Kazakhstan	56.4	0.02	56.42	8700286	4.9087e+06	Relig
Kenya	7	<0.01	91.2	22962650	2.09419e+07	Survey
Kiribati	<0.1	–	0.1	51500	51.5	Relig
Korea, North	<0.1	–	0.1	12105264	12105.3	Relig
Korea, South	0.2	<0.01	76.98	24557598	1.89044e+07	Survey
Kosovo	91.7	–	91.7	962738	882831	Relig
Kuwait	86.4	–	86.4	1631466	1.40959e+06	Relig
Kyrgyzstan	88.8	0.01	91.9	2774664	2.54992e+06	Survey
Laos	<0.1	–	0.1	3438406	3438.41	Relig
Latvia	0.1	0.28	0.38	912810	3468.68	Relig
Lebanon	59.7	–	59.7	3092351	1.84613e+06	Survey
Lesotho	<0.1	–	52	964013	501287	Survey
Liberia	12.8	–	97.7	2087291	2.03928e+06	Survey
Libya	96.6	–	96.6	3329191	3.216e+06	Relig
Liechtenstein	4.8	–	4.8	18717	898.416	Relig
Lithuania	0.1	0.1	0.2	1325280	2650.56	Relig
Luxembourg	2.3	0.12	2.42	286545	6934.39	Relig
Macau	<0.1	–	0.1	282401	282.401	Relig
Macedonia	33.9	<0.01	33.91	1042741	353593	Relig
Madagascar	1.1	–	94.7	11906341	1.12753e+07	Survey
Malawi	12.8	–	21.6	8891618	1.92059e+06	Survey
Malaysia	61.4	–	61.4	15482396	9.50619e+06	Relig
Maldives	98.4	–	98.4	219247	215739	Relig
Mali	92.4	–	86	8260391	7.10394e+06	Survey
Malta	0.3	–	0.3	205942	617.826	Relig
Marshall Islands	<0.1	–	0.1	36803	36.803	Culture
Mauritania	99.2	–	99.2	1733126	1.71926e+06	Relig
Mauritius	16.6	–	16.6	659712	109512	Relig
Mexico	0.1	0.03	15.4	59626192	9.18243e+06	Survey
Micronesia, Fed States	<0.1	–	0.1	52077	52.077	Culture
Moldova	0.4	0.1	0.5	1727951	8639.75	Relig
Monaco	0.5	–	0.5	14876	74.38	Relig
Mongolia	4.4	–	4.4	1465912	64500.1	Relig
Montenegro	18.5	–	18.5	321911	59553.5	Relig
Montserrat	0.1	–	0.1	2621	2.621	Relig
Morocco	99.9	0.01	99.91	16407623	1.63929e+07	Relig
Mozambique	22.8	–	47.4	12327158	5.84307e+06	Survey
Namibia	0.4	<0.01	25.5	1117106	284862	Survey
Nauru	<0.1	–	95	4519	4293.05	Culture
Nepal	4.2	–	4.2	15616302	655885	Relig
Netherlands	5.5	0.18	5.68	8388357	476459	Relig
New Caledonia	2.8	–	50	135808	67904	Culture
New Zealand	0.9	0.17	33.05	2208045	729759	Survey
Nicaragua	<0.1	–	0.1	2878198	2878.2	Relig
Niger	98.3	–	95.5	9067754	8.65971e+06	Survey
Nigeria	47.9	<0.01	98.9	92561049	9.15429e+07	Survey
Niue	<0.1	–	95	599	569.05	Culture
Norfolk Island	0	–	0.1	1113	1.113	No info
Northern Mariana Islands	0.7	–	90	25223	22700.7	Culture
Norway	3	0.03	3.03	2616799	79289	Relig
Oman	87.7	–	87.7	1792874	1.57235e+06	Relig
Pakistan	96.4	–	96.4	102442232	9.87543e+07	Relig
Palau	<0.1	–	95	11139	10582	Culture
Panama	0.7	0.25	0.95	1837609	17457.3	Relig
Papua New Guinea	<0.1	–	10.1	3417586	345176	Survey
Paraguay	<0.1	<0.01	0.11	3408510	3749.36	Relig
Peru	<0.1	<0.01	3.7	14990684	554655	Survey
Philippines	5.1	<0.01	91.75	50750178	4.65633e+07	Survey
Pitcairn Islands	0	–	0.1	24	0.024	No info
Poland	0.1	0.01	0.11	18684772	20553.2	Relig
Portugal	0.6	0.01	0.61	5273868	32170.6	Relig
Puerto Rico	0.1	0.04	0.14	1724213	2413.9	Relig
Qatar	77.5	–	77.5	1694859	1.31352e+06	Relig
Romania	0.3	0.04	0.34	10555401	35888.4	Relig
Russia	11.7	0.13	11.83	65851852	7.79027e+06	Relig
Rwanda	1.8	–	13.3	6299053	837774	Survey
Saint Barthelemy	–	–	0.1	3839	3.839	No info
Saint Helena Ascension & Tristan da Cunha	<0.1	–	0.1	3936	3.936	Relig
Saint Kitts & Nevis	0.3	–	0.3	25968	77.904	Relig
Saint Lucia	0.1	–	0.1	79859	79.859	Relig
Saint Martin & Tristan da Cunha	–	–	0.1	15301	15.301	No info
Saint Pierre & Miquelon	0.2	–	0.2	2771	5.542	Relig
Saint Vincent & the Grenadines	1.7	–	1.7	52072	885.224	Relig
Samoa	<0.1	–	95	100825	95783.8	Culture
San Marino	<0.1	–	0.1	15999	15.999	Relig
Sao Tome & Principe	<0.1	–	0.1	98503	98.503	Relig
Saudi Arabia	97.1	–	97.1	15080026	1.46427e+07	Relig
Senegal	95.9	–	93.5	6771796	6.33163e+06	Survey
Serbia	3.7	0.01	3.71	3496387	129716	Relig
Seychelles	1.1	–	1.1	47342	520.762	Relig
Sierra Leone	71.5	–	96.1	2848635	2.73754e+06	Survey
Singapore	14.9	<0.01	14.905	2779333	414260	Relig
Sint Maarten	–	0.06	0.06	19542	11.7252	Relig
Slovakia	0.1	0.05	0.15	2652705	3979.06	Relig
Slovenia	2.4	<0.01	8.55	966278	82616.8	Survey
Solomon Islands	<0.1	–	95	317337	301470	Culture
Somalia	98.6	–	93.5	5334599	4.98785e+06	Survey
South Africa	1.5	0.13	44.7	26566693	1.18753e+07	Survey
South Sudan	–	–	23.6333	6081073	1.43716e+06	Survey
Spain	2.3	0.03	6.65	23829905	1.58469e+06	Survey
Sri Lanka	8.5	–	8.5	10801708	918145	Relig
Sudan	71.4	–	39.45	18233183	7.19299e+06	Survey
Suriname	15.9	0.03	15.93	291258	46397.4	Relig
Svalbard	–	–	0.1	943	0.943	No info
Swaziland	0.2	–	8.2	717807	58860.2	Survey
Sweden	4.9	0.16	5.06	4900808	247981	Relig
Switzerland	5.7	0.24	5.94	3999074	237545	Relig
Syria	92.8	<0.01	92.81	8574877	7.95834e+06	Relig
Taiwan	0.1	<0.01	8.3	11648731	966845	Survey
Tajikistan	99	–	99	4075396	4.03464e+06	Relig
Tanzania	29.9	–	72	25394685	1.82842e+07	Survey
Thailand	5.8	<0.01	11.87	33470616	3.97296e+06	Survey
Timor-Leste	0.1	–	6.4	618620	39591.7	Culture
Togo	12.2	–	95.25	3638016	3.46521e+06	Survey
Tokelau	<0.1	–	95	673	639.35	Culture
Tonga	<0.1	–	95	53515	50839.2	Culture
Trinidad & Tobago	5.8	–	5.8	620214	35972.4	Relig
Tunisia	99.8	0.01	99.81	5490881	5.48045e+06	Relig
Turkey	98.6	0.02	98.62	39904682	3.9354e+07	Relig
Turkmenistan	93.3	0.08	93.38	2589290	2.41788e+06	Relig
Turks & Caicos Islands	<0.1	–	0.1	25389	25.389	Relig
Tuvalu	0.1	–	95	5352	5084.4	Culture
Uganda	12	–	26.7	18457652	4.92819e+06	Survey
Ukraine	0.9	0.14	2.3	20542659	472481	Survey
United Arab Emirates	76	–	76	3962225	3011291	Relig
United Kingdom	4.6	0.45	20.7	31883085	6.5998e+06	Survey
United States	0.8	1.8	80.5	158237461	1.27381e+08	Survey
Uruguay	<0.1	0.51	0.62	1619268	10039.5	Relig
Uzbekistan	96.5	0.01	96.51	14526604	1.40196e+07	Relig
Vanuatu	<0.1	–	95	136132	129325	Culture
Venezuela	0.3	0.03	0.33	14489874	47816.6	Relig
Vietnam	0.2	–	0.2	47174418	94348.8	Relig
Virgin Islands	0.1	0.45	0.55	48187	265.029	Relig
Wallis & Futuna	<0.1	–	0.1	7922	7.922	Relig
West Bank	98	6.6	99.9	1419991	1.41857e+06	Relig
Western Sahara	99.6	–	99.6	283999	282863	Relig
Yemen	99	<0.01	99.01	13566225	1.34319e+07	Relig
Zambia	0.4	–	21.6	7533133	1.62716e+06	Survey
Zimbabwe	0.9	<0.01	9.2	7150167	657815	Survey
				Total Males	Total MC	MC%
				3654384123	1.42569e+09	39.0132
