# Supplementary material for: Erratum to: Estimation of country-specific and global prevalence of male circumcision
Source: Popul Health Metr. 2016 Apr 4;14:11. doi: 10.1186/s12963-016-0080-6 (PMC4820865; doi:10.1186/s12963-016-0080-6)
Supplement: Additional file 3: — This spreadsheet shows data for number of males using UN data for all but 45 countries and territories in the world and estimates of number of circumcised males in all but these 45, as well as basis for the estimate and MC percentage for each. (XLSX 31 kb) [file 12963_2016_80_MOESM3_ESM.xlsx]

## Sheet: Sheet1
Country/Territory	Muslim %	Jewish %	MC %	UN Total Males (thousands) 15-64	UN & CIA Total Males	Total MC	Basis
Afghanistan	99.8	–	99.8	9054.24	9054235	9.03613e+06	Relig
Albania	82.1	–	47.7	988.263	988263	471401	Survey
Algeria	97.9	–	97.9	13078.8	13078849	1.28042e+07	Relig
American Samoa*	<0.1	–	95		27172	25813.4	Culture
Andorra*	1.1	–	1.1		44036	484.396	Relig
Angola	1	–	57.5	6172.06	6172065	3.54894e+06	Survey
Anguilla*	0.3	–	0.3		7867	23.601	Relig
Antigua & Barbuda	0.6	–	0.6	29.975	29975	179.85	Relig
Argentina	2.5	0.43	2.93	13775.8	13775816	403631	Relig
Armenia	<0.1	–	0.1	985.529	985529	985.529	Relig
Aruba	0.4	0.06	0.46	34.257	34257	157.582	Relig
Australia	1.9	0.49	58	7982.33	7982331	4.62975e+06	Survey
Austria	5.7	0.11	5.81	2881.39	2881391	167409	Relig
Azerbaijan	98.4	0.1	98.5	3482.51	3482508	3.43027e+06	Relig
Bahamas, The	0.1	0.1	0.2	134.875	134875	269.75	Relig
Bahrain	81.2	–	81.2	684.775	684775	556037	Relig
Bangladesh	90.4	–	93.25	53016.7	53016700	4.94381e+07	Survey
Barbados	0.9	–	0.9	90.931	90931	818.379	Relig
Belarus	0.2	0.12	0.32	3205.73	3205728	10258.3	Relig
Belgium	6	0.27	22.6	3685.97	3685967	833029	Survey
Belize	0.1	–	0.1	113.314	113314	113.314	Relig
Benin	24.5	–	92.9	2978.04	2978042	2.7666e+06	Survey
Bermuda*	0.8	–	0.8		34012	272.096	Relig
Bhutan	1	–	1	288.45	288450	2884.5	Relig
Bolivia	<0.1	<0.01	0.11	3274.62	3274619	3602.08	Relig
Bosnia & Herzegovina	41.6	0.01	41.61	1380.88	1380881	574585	Relig
Botswana	0.4	<0.01	15.1	730.071	730071	110241	Survey
Brazil	0.1	0.05	1.3	70833.1	70833064	920830	Survey
British Virgin Islands*	1.2	–	1.2		16030	192.36	Relig
Brunei	51.9	–	51.9	158.871	158871	82454	Relig
Bulgaria	13.4	0.03	13.43	2375.07	2375073	318972	Relig
Burkina Faso	58.9	–	88.3	4647.63	4647633	4.10386e+06	Survey
Burma (Myanmar)	3.8	–	3.5	17613.9	17613883	616486	Survey
Burundi	2.2	–	61.7	2891.84	2891844	1.78427e+06	Survey
Cabo Verde	0.1	–	0.1	168.887	168887	168.887	Relig
Cambodia	1.6	–	3.5	4834.11	4834109	169194	Survey
Cameroon	18	–	94	6332.57	6332570	5.95262e+06	Survey
Canada	2.8	1.09	31.9	12252	12252002	3.90839e+06	Survey
Cayman Islands*	0.2	–	0.2		27327	54.654	Relig
Central African Republic	8.9	–	63	1379.47	1379473	869068	Survey
Chad	55.7	–	73.5	3490.78	3490776	2.56572e+06	Survey
Chile	<0.1	0.11	0.21	6191.66	6191658	13002.5	Relig
China	1.8	<0.01	13.9667	518357	518357063	7.23972e+07	Survey
Christmas Island*	–	–	0.1		770	0.77	No info
Cocos (Keeling) Islands*	–	–	95		300	285	Culture
Columbia	<0.1	<0.01	4.2	16273.7	16273666	683494	Survey
Comoros	98.3	–	99.4	226.106	226106	224749	Survey
Congo, Dem Rep	1.4	<0.01	97.2	19598.6	19598624	1.90499e+07	Survey
Congo, Republic	1.6	–	70	1242.18	1242176	869523	Survey
Cook Islands*	<0.1	–	95		5085	4830.75	Culture
Costa Rica	<0.1	0.05	0.15	1657.27	1657270	2485.91	Relig
Cote d’Ivoire	36.9	–	96.7	6316.4	6316403	6.10796e+06	Survey
Croatia	1.3	0.04	1.34	1403.76	1403757	18810.3	Relig
Cuba	0.1	<0.01	0.11	4024.97	4024970	4427.47	Relig
Curacao	<0.01	0.06	0.07	47.598	47598	33.3186	Relig
Cyprus	22.7	–	22.7	427.232	427232	96981.7	Relig
Czech Republic	<0.1	0.04	0.14	3576.6	3576598	5007.24	Relig
Denmark	4.1	0.12	5.3	1831.58	1831581	97073.8	Survey
Djibouti	97	–	96.5	281.382	281382	271534	Survey
Dominica*	0.2	–	0.2		37168	74.336	Relig
Dominican Republic	<0.1	<0.01	13.7	3308.61	3308609	453279	Survey
Ecuador	<0.1	<0.01	0.11	5177.76	5177760	5695.54	Relig
Egypt	94.7	<0.01	94.7	28520.2	28520164	2.70086e+07	Relig
El Salvador	<0.1	<0.01	0.11	1813.53	1813526	1994.88	Relig
Equatorial Guinea	4.1	–	87	253.2	253200	220284	Survey
Eritrea	36.5	–	97.25	1420.9	1420900	1.38183e+06	Survey
Estonia	0.1	0.15	0.25	422.913	422913	1057.28	Relig
Ethiopia	33.8	<0.01	92.2	27169.4	27169402	2.50502e+07	Survey
Falkland Islands (Islas Malvinas)*	<0.1	–	0.1		1689	1.689	Relig
Faroe Islands*	<0.1	–	0.1		26179	26.179	Relig
Fiji	6.3	–	55	297.683	297683	163726	Culture
Finland	0.8	0.02	0.82	1760.65	1760651	14437.3	Relig
France	7.5	0.74	14	19891.6	19891585	2.78482e+06	Survey
French Polynesia	<0.1	–	78	101.891	101891	79475	Culture
Gabon	9.7	–	99.2	509.376	509376	505301	Survey
Gambia, The	95.3	–	94.5	497.713	497713	470339	Survey
Gaza Strip*	98	6.6	99.9		952852	951899	Relig
Georgia	10.5	0.06	10.56	1331.34	1331337	140589	Relig
Germany	5	0.15	6.7	26839.8	26839807	1.79827e+06	Survey
Ghana	16.1	–	91.6	7781.24	7781236	7.12761e+06	Survey
Gibraltar*	4	2	6		14702	882.12	Relig
Greece	4.7	0.04	4.74	3484.14	3484145	165148	Relig
Greenland*	<0.1	–	0.1		30241	30.241	Relig
Grenada	0.3	–	0.3	35.952	35952	107.856	Relig
Guam	<0.1	–	95	57.16	57160	54302	Culture
Guatemala	<0.1	<0.01	0.11	4588.14	4588143	5046.96	Relig
Guernsey*	0.1	–	0.1		32874	32.874	Relig
Guinea	84.2	–	84.2	3439.52	3439516	2.89607e+06	Relig
Guinea-Bissau	42.8	–	93.3333	512.474	512474	478309	Survey
Guyana	7.2	–	12	256.114	256114	30733.7	Survey
Haiti	<0.1	–	6.2	3239.95	3239945	200877	Survey
Holy See* (Vatican City); (assume all male)	<0.1	–	0.1		842	0.842	No info
Honduras	0.1	–	0.1	2546.13	2546132	2546.13	Relig
Hong Kong	1.3	–	28	2457.93	2457931	688221	Survey
Hungary	0.3	0.48	0.78	3300.84	3300840	25746.6	Relig
Iceland	0.1	–	0.1	109.685	109685	109.685	Relig
India	14.6	<0.01	13.5	445646	445646397	6.01623e+07	Survey
Indonesia	88.1	–	92.5	87138.1	87138090	8.06027e+07	Survey
Iran	99.7	0.01	99.71	28220.5	28220484	2.81386e+07	Relig
Iraq	98.9	–	98.9	10257.9	10257898	1.01451e+07	Relig
Ireland	0.9	0.03	0.93	1528.62	1528615	14216.1	Relig
Isle of Man*	0.2	–	0.2		43773	87.546	Relig
Israel	17.7	74	91.7	2446.78	2446777	2.24369e+06	Relig
Italy	2.6	0.05	2.65	19086.6	19086580	505794	Relig
Jamaica	<0.1	0.01	14	934.451	934451	130823	Survey
Japan	0.1	<0.01	9	38803.4	38803422	3.49231e+06	Survey
Jersey*	0.1	–	0.1		47906	47.906	Relig
Jordan	98.8	–	98.8	2376.26	2376257	2.34774e+06	Relig
Kazakhstan	56.4	0.02	56.42	5673.06	5673063	3.20074e+06	Relig
Kenya	7	<0.01	91.2	12714.7	12714716	1.15958e+07	Survey
Kiribati	<0.1	–	0.1	33.643	33643	33.643	Relig
Korea, North	<0.1	–	0.1	8732.87	8732868	8732.87	Relig
Korea, South	0.2	<0.01	76.98	18608.3	18608288	1.43247e+07	Survey
Kosovo*	91.7	–	91.7		962738	882831	Relig
Kuwait	86.4	–	86.4	1696.97	1696967	1.46618e+06	Relig
Kyrgyzstan	88.8	0.01	91.9	1888.85	1888850	1.73585e+06	Survey
Laos	<0.1	–	0.1	2066.21	2.06621e+06	2066.21	Relig
Latvia	0.1	0.28	0.38	628.755	628755	2389.27	Relig
Lebanon	59.7	–	59.7	2002.74	2002743	1.19564e+06	Survey
Lesotho	<0.1	–	52	634.303	634303	329838	Survey
Liberia	12.8	–	97.7	1234.93	1234927	1.20652e+06	Survey
Libya	96.6	–	96.6	2065.3	2065295	1.99507e+06	Relig
Liechtenstein*	4.8	–	4.8		18717	898.416	Relig
Lithuania	0.1	0.1	0.2	929.585	929585	1859.17	Relig
Luxembourg	2.3	0.12	2.42	201.742	201742	4882.16	Relig
Macau	<0.1	–	0.1	219	219000	219	Relig
Macedonia	33.9	<0.01	33.91	743.207	743207	252021	Relig
Madagascar	1.1	–	94.7	6674.47	6674474	6.32073e+06	Survey
Malawi	12.8	–	21.6	4424.53	4424534	955699	Survey
Malaysia	61.4	–	61.4	10464.4	10464438	6.42516e+06	Relig
Maldives	98.4	–	98.4	121.81	121810	119861	Relig
Mali	92.4	–	86	4424.86	4424863	3.80538e+06	Survey
Malta	0.3	–	0.3	141.775	141775	425.325	Relig
Marshall Islands*	<0.1	–	0.1		36803	36.803	Culture
Mauritania	99.2	–	99.2	1164.8	1164799	1.15548e+06	Relig
Mauritius	16.6	–	16.6	451.963	451963	75025.9	Relig
Mexico	0.1	0.03	15.4	41493.8	41493799	6.39005e+06	Survey
Micronesia, Fed States	<0.1	–	0.1	33.025	33025	33.025	Culture
Moldova	0.4	0.1	0.5	1473.93	1473933	7369.66	Relig
Monaco*	0.5	–	0.5		14876	74.38	Relig
Mongolia	4.4	–	4.4	992.053	992053	43650.3	Relig
Montenegro	18.5	–	18.5	212.451	212451	39303.4	Relig
Montserrat*	0.1	–	0.1		2621	2.621	Relig
Morocco	99.9	0.01	99.91	11202.2	11202223	1.11921e+07	Relig
Mozambique	22.8	–	47.4	6905.64	6905636	3.27327e+06	Survey
Namibia	0.4	<0.01	25.5	708.199	708199	180591	Survey
Nauru*	<0.1	–	95		4519	4293.05	Culture
Nepal	4.2	–	4.2	8299.25	8299248	348568	Relig
Netherlands	5.5	0.18	5.68	5567.25	5567250	316220	Relig
New Caledonia	2.8	–	50	89.852	89852	44926	Culture
New Zealand	0.9	0.17	33.05	1431.51	1431509	473114	Survey
Nicaragua	<0.1	–	0.1	1924.1	1924099	1924.1	Relig
Niger	98.3	–	95.5	4661.87	4661868	4.45208e+06	Survey
Nigeria	47.9	<0.01	98.9	49338.7	49338702	4.8796e+07	Survey
Niue*	<0.1	–	95		599	569.05	Culture
Norfolk Island*	0	–	0.1		1113	1.113	No info
Northern Mariana Islands*	0.7	–	90		25223	22700.7	Culture
Norway	3	0.03	3.03	1757.35	1757347	53247.6	Relig
Oman	87.7	–	87.7	2447.54	2447537	2.14649e+06	Relig
Pakistan	96.4	–	96.4	58361	58360955	5.626e+07	Relig
Palau*	<0.1	–	95		11139	10582	Culture
Panama	0.7	0.25	0.95	1285.02	1285020	12207.7	Relig
Papua New Guinea	<0.1	–	10.1	2321.99	2321993	234521	Survey
Paraguay	<0.1	<0.01	0.11	2158.54	2158544	2374.4	Relig
Peru	<0.1	<0.01	3.7	10231	10231044	378549	Survey
Philippines	5.1	<0.01	91.75	32275.7	32275659	2.96129e+07	Survey
Pitcairn Islands*	0	–	0.1		24	0.024	No info
Poland	0.1	0.01	0.11	13385	13384995	14723.5	Relig
Portugal	0.6	0.01	0.61	3253.15	3253146	19844.2	Relig
Puerto Rico	0.1	0.04	0.14	1185.95	1185950	1660.33	Relig
Qatar	77.5	–	77.5	1423.48	1423479	1.1032e+06	Relig
Romania	0.3	0.04	0.34	6535.71	6535711	22221.4	Relig
Russia	11.7	0.13	11.83	48088.6	48088617	5.68888e+06	Relig
Rwanda	1.8	–	13.3	3048.67	3048670	405473	Survey
Saint Barthelemy*	–	–	0.1		3839	3.839	No info
Saint Helena Ascension & Tristan da Cunha*	<0.1	–	0.1		3936	3.936	Relig
Saint Kitts & Nevis*	0.3	–	0.3		25968	77.904	Relig
Saint Lucia	0.1	–	0.1	61.712	61712	61.712	Relig
Saint Martin & Tristan da Cunha*	–	–	0.1		15301	15.301	No info
Saint Pierre & Miquelon*	0.2	–	0.2		2771	5.542	Relig
Saint Vincent & the Grenadines	1.7	–	1.7	37.974	37974	645.558	Relig
Samoa	<0.1	–	95	58.021	58021	55119.9	Culture
San Marino*	<0.1	–	0.1		15999	15.999	Relig
Sao Tome & Principe	<0.1	–	0.1	51.331	51331	51.331	Relig
Saudi Arabia	97.1	–	97.1	12812.6	12812600	1.2441e+07	Relig
Senegal	95.9	–	93.5	3887.95	3887954	3.63524e+06	Survey
Serbia	3.7	0.01	3.71	2943.88	2943882	109218	Relig
Seychelles	1.1	–	1.1	34.565	34565	380.215	Relig
Sierra Leone	71.5	–	96.1	1744.14	1744138	1.67612e+06	Survey
Singapore	14.9	<0.01	14.905	2024.2	2024203	301707	Relig
Sint Maarten*	–	0.06	0.06		19542	11.7252	Relig
Slovakia	0.1	0.05	0.15	1923.16	1923164	2884.75	Relig
Slovenia	2.4	<0.01	8.55	714.944	714944	61127.7	Survey
Solomon Islands	<0.1	–	95	167.63	167630	159248	Culture
Somalia	98.6	–	93.5	2694.52	2694520	2.51938e+06	Survey
South Africa	1.5	0.13	44.7	17850.2	17850197	7.97904e+06	Survey
South Sudan	–	–	23.6333	3351.12	3351124	791982	Survey
Spain	2.3	0.03	6.65	15373.4	15373368	1.02233e+06	Survey
Sri Lanka	8.5	–	8.5	6580.43	6580434	559337	Relig
Sudan	71.4	–	39.45	11293.7	11293670	4.45535e+06	Survey
Suriname	15.9	0.03	15.93	181.537	181537	28918.8	Relig
Svalbard*	–	–	0.1		943	0.943	No info
Swaziland	0.2	–	8.2	374.854	374854	30738	Survey
Sweden	4.9	0.16	5.06	3120.85	3120851	157915	Relig
Switzerland	5.7	0.24	5.94	2817.52	2817519	167361	Relig
Syria	92.8	<0.01	92.81	5498.41	5498407	5.10307e+06	Relig
Taiwan*	0.1	<0.01	8.3		11648731	966845	Survey
Tajikistan	99	–	99	2642.58	2642582	2.61616e+06	Relig
Tanzania	29.9	–	72	13631.6	13631632	9.81478e+06	Survey
Thailand	5.8	<0.01	11.87	24139.5	24139538	2.86536e+06	Survey
Timor-Leste	0.1	–	6.4	313.671	313671	20074.9	Culture
Togo	12.2	–	95.25	1971.26	1971262	1.87763e+06	Survey
Tokelau*	<0.1	–	95		673	639.35	Culture
Tonga	<0.1	–	95	30.469	30469	28945.5	Culture
Trinidad & Tobago	5.8	–	5.8	472.557	472557	27408.3	Relig
Tunisia	99.8	0.01	99.81	3833.68	3833681	3.8264e+06	Relig
Turkey	98.6	0.02	98.62	25841	25841019	2.54844e+07	Relig
Turkmenistan	93.3	0.08	93.38	1781.62	1781621	1.66368e+06	Relig
Turks & Caicos Islands *	<0.1	–	0.1		25389	25.389	Relig
Tuvalu*	0.1	–	95		5352	5084.4	Culture
Uganda	12	–	26.7	9616.7	9616702	2.56766e+06	Survey
Ukraine	0.9	0.14	2.3	15015.7	15015725	345362	Survey
United Arab Emirates	76	–	76	5978.64	5978641	4.54377e+06	Relig
United Kingdom	4.6	0.45	20.7	20818	20818038	4.30933e+06	Survey
United States	0.8	1.8	80.5	107223	107223270	8.63147e+07	Survey
Uruguay	<0.1	0.51	0.62	1089.2	1089202	6753.05	Relig
Uzbekistan	96.5	0.01	96.51	9773.26	9773256	9.43217e+06	Relig
Vanuatu	<0.1	–	95	78.179	78179	74270.1	Culture
Venezuela	0.3	0.03	0.33	10159.5	10159541	33526.5	Relig
Vietnam	0.2	–	0.2	32632.8	32632790	65265.6	Relig
Virgin Islands*	0.1	0.45	0.55		48187	265.029	Relig
Wallis & Futuna*	<0.1	–	0.1		7922	7.922	Relig
West Bank*	98	6.6	99.9		1419991	1.41857e+06	Relig
Western Sahara	99.6	–	99.6	216.559	216559	215693	Relig
Yemen	99	<0.01	99.01	7684.04	7684044	7.60797e+06	Relig
Zambia	0.4	–	21.6	4139.78	4139785	894194	Survey
Zimbabwe	0.9	<0.01	9.2	4227.4	4227400	388921	Survey
					Total Males	Total MC	MC%
					2448667439	9.07739e+08	37.0707
